# Supplementary material for: Application of layer-by-layer coatings to tissue scaffolds – development of an angiogenic biomaterial
Source: Royal Society of Chemistry journal article supplement (doi:10.1039/c4tb00448e), 2014-01-01
Supplement: c4tb00448e1.pdf [file c4tb00448e1.pdf]

Electronic Supplementary Information (ESI) available:

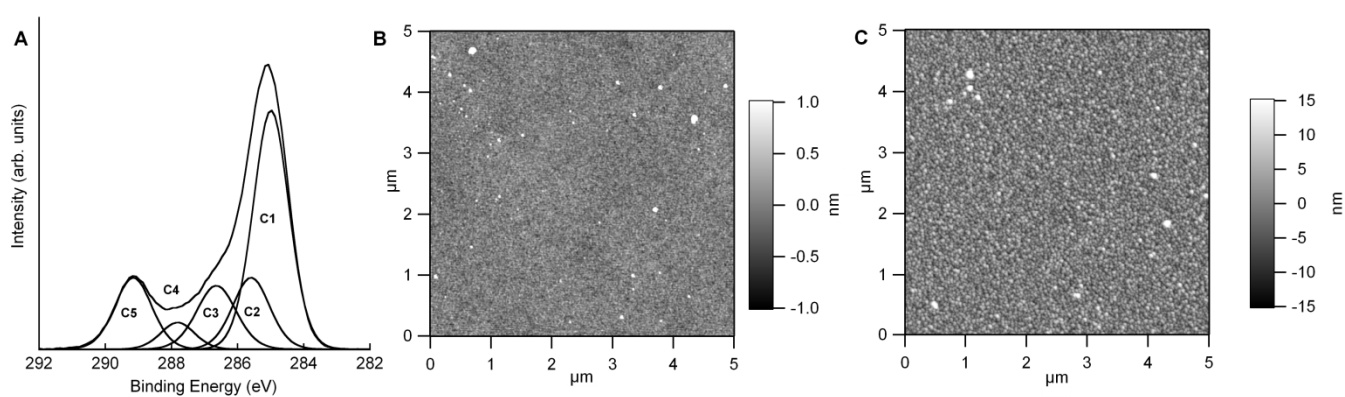

Fig. S1. Selected, representative data of ppAAc on Si wafer, (A) XPS high res C 1s, (B) AFM, (C) AFM of PEI on ppAAc on Si wafer.

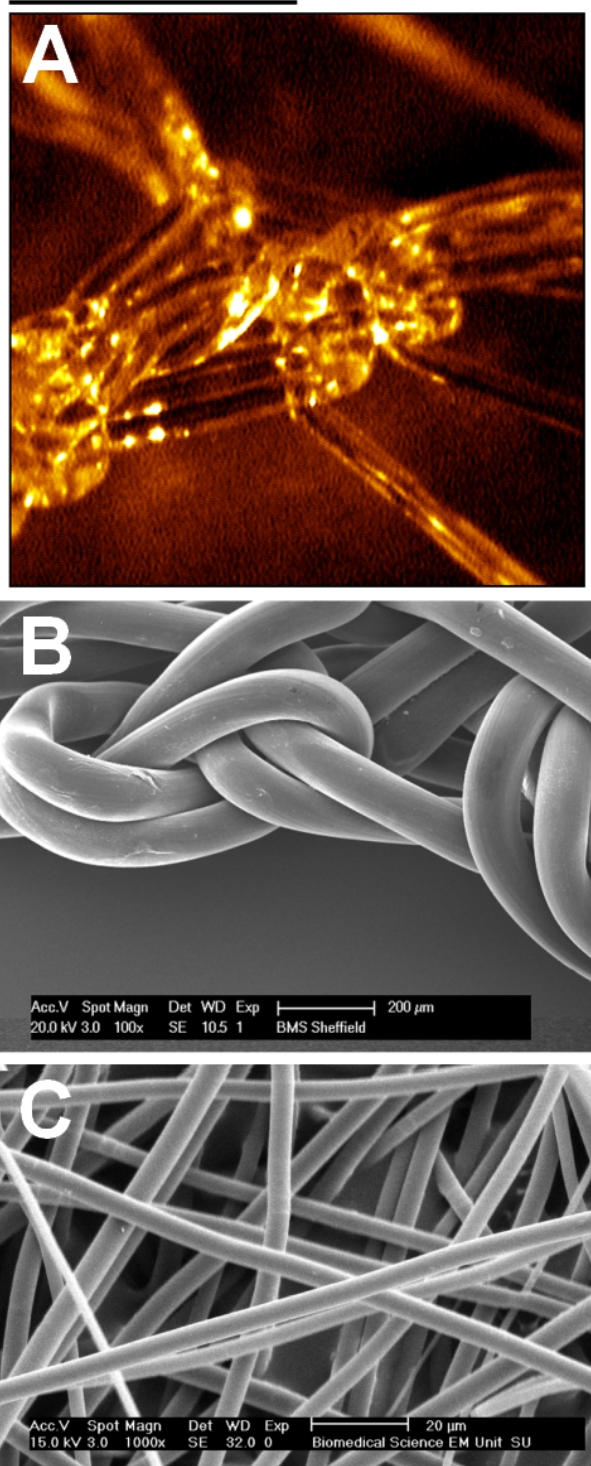

Fig. S2. (A) Optical image of PP scaffold (example of position used for XPS analysis, scale bar = 500 μm), SEM photographs of (B) PP scaffold, 100x magnification and (C) electrospun PLGA scaffold, 1000x magnification.

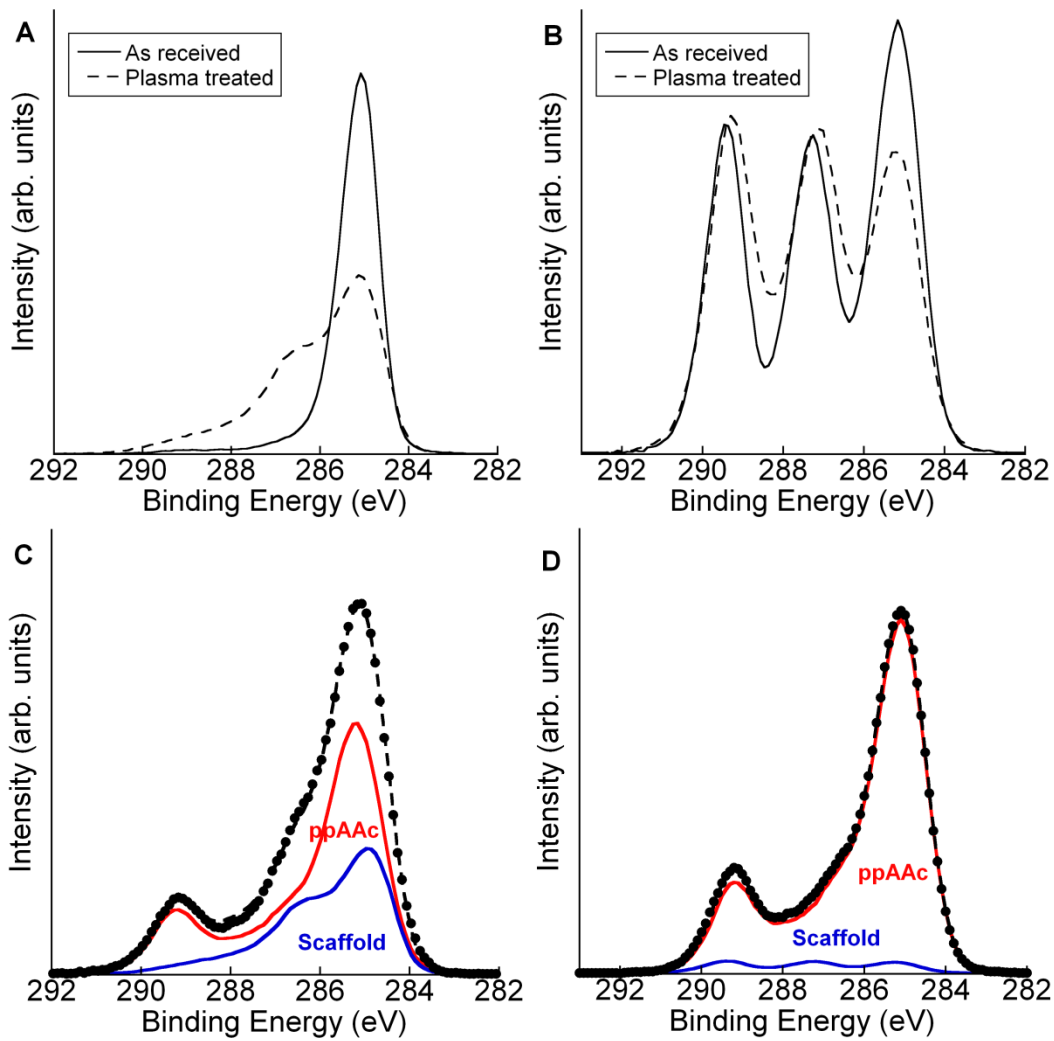

Fig. S3. Selected, representative XPS high resolution C 1s spectra of samples prepared on tissue scaffolds (A) PP as received and plasma treated, (B) PLGA as received and plasma treated, (C) PP + plasma treatment + ppAAc, (D) PLGA + plasma treatment + ppAAc
